# Supplementary material for: Repeated Use of Prescription Drugs in Pediatrics: Comprehensive Overview Based on German Claims Data
Source: PubMed Central journal article supplement (PMC8319624; doi:10.3389/fphar.2021.706682), 2021-07-15
Supplement: DataSheet1.pdf [file DataSheet1.pdf]

## Supplementary Material

**Supplementary Table 1A.** Prevalence of repeated ( $\geq 3$  per year) use of prescription drugs on the level of therapeutic subgroups (ATC 2nd level) by sex and age

|                     | Prevalence per 1,000 person-years (95% Confidence Interval) |                      |                      |
|---------------------|-------------------------------------------------------------|----------------------|----------------------|
|                     | Total                                                       | Girls                | Boys                 |
| <b>Overall</b>      | 132.1 (131.7, 132.6)                                        | 140.0 (139.4, 140.7) | 124.7 (124.1, 125.3) |
| <b>Age in years</b> |                                                             |                      |                      |
| <2                  | 109.9 (108.6, 111.1)                                        | 90.5 (88.8, 92.2)    | 128.3 (126.4, 130.2) |
| 2–5                 | 141.3 (140.4, 142.3)                                        | 129.9 (128.6, 131.1) | 152.3 (150.9, 153.6) |
| 6–12                | 98.0 (97.4, 98.6)                                           | 82.6 (81.8, 83.4)    | 112.5 (111.6, 113.4) |
| 13–17               | 175.4 (174.6, 176.3)                                        | 236.3 (234.9, 237.7) | 118.1 (117.0, 119.1) |

Repeated use was defined as receiving at least three (not necessarily the same kind of) prescription drugs within the same therapeutic subgroup (on different days).

**Supplementary Table 1B.** Prevalence of repeated ( $\geq 3$  per year) use of the same prescription drug (ATC 5th level) by sex and age

|                     | Prevalence per 1,000 person-years (95% Confidence Interval) |                      |                   |
|---------------------|-------------------------------------------------------------|----------------------|-------------------|
|                     | Total                                                       | Girls                | Boys              |
| <b>Overall</b>      | 97.0 (96.6, 97.4)                                           | 104.7 (104.2, 105.2) | 89.7 (89.2, 90.2) |
| <b>Age in years</b> |                                                             |                      |                   |
| <2                  | 66.6 (65.6, 67.6)                                           | 54.3 (53.0, 55.7)    | 78.3 (76.7, 79.8) |
| 2–5                 | 81.4 (80.6, 82.1)                                           | 73.9 (72.9, 74.9)    | 88.4 (87.4, 89.5) |
| 6–12                | 71.6 (71.0, 72.1)                                           | 55.2 (54.5, 55.9)    | 87.0 (86.2, 87.8) |
| 13–17               | 150.7 (149.9, 151.5)                                        | 206.8 (205.5, 208.1) | 97.8 (96.8, 98.7) |

Repeated use was defined as receiving at least three (of the same) prescription drugs on different days.

**Supplementary Table 2.** Ratio of the prevalence of repeated use to the prevalence of any use of the 10 most common therapeutic subgroups used repeatedly in each age group among girls

| ATC code, individuals with any use (n), individuals with chronic use (n), ratio (%) |         |        |      |          |        |       |      |           |         |        |      |            |         |        |      |             |        |        |      |
|-------------------------------------------------------------------------------------|---------|--------|------|----------|--------|-------|------|-----------|---------|--------|------|------------|---------|--------|------|-------------|--------|--------|------|
| All girls                                                                           |         |        |      | <2 years |        |       |      | 2–5 years |         |        |      | 6–12 years |         |        |      | 13–17 years |        |        |      |
| G03                                                                                 | 88,939  | 52,610 | 59.2 | R03      | 25,204 | 3,945 | 15.7 | J01       | 106,937 | 18,150 | 17.0 | J01        | 116,532 | 14,319 | 12.3 | G03         | 81,890 | 52,521 | 64.1 |
| J01                                                                                 | 343,730 | 48,716 | 14.2 | J01      | 27,191 | 3,614 | 13.3 | R03       | 52,328  | 10,402 | 19.9 | R03        | 38,861  | 7,919  | 20.4 | J01         | 93,070 | 12,633 | 13.6 |
| R03                                                                                 | 140,768 | 27,193 | 19.3 | S01      | 28,234 | 2,104 | 7.5  | S01       | 62,852  | 4,094  | 6.5  | N06        | 4,409   | 3,387  | 76.8 | D10         | 27,065 | 5,362  | 19.8 |
| N06                                                                                 | 12,695  | 8,506  | 67.0 | J06      | 1,085  | 579   | 53.4 | A06       | 8,954   | 2,621  | 29.3 | N03        | 2,144   | 1,715  | 80.0 | N06         | 8,251  | 5,111  | 61.9 |
| S01                                                                                 | 141,619 | 8,363  | 5.9  | D07      | 6,805  | 437   | 6.4  | R05       | 34,901  | 1,958  | 5.6  | D07        | 27,554  | 1,342  | 4.9  | R03         | 24,375 | 4,927  | 20.2 |
| H03                                                                                 | 10,046  | 5,785  | 57.6 | A11      | 25,441 | 398   | 1.6  | D07       | 20,196  | 1,231  | 6.1  | A06        | 5,337   | 1,341  | 25.1 | H03         | 7,556  | 4,176  | 55.3 |
| D10                                                                                 | 30,445  | 5,626  | 18.5 | H02      | 9,349  | 354   | 3.8  | H02       | 21,538  | 1,158  | 5.4  | H03        | 1,993   | 1,296  | 65.0 | M01         | 49,868 | 3,320  | 6.7  |
| D07                                                                                 | 78,591  | 4,389  | 5.6  | R05      | 8,309  | 281   | 3.4  | N03       | 724     | 530    | 73.2 | S01        | 32,422  | 1,285  | 4.0  | N03         | 1,906  | 1,444  | 75.8 |
| A06                                                                                 | 15,495  | 4,246  | 27.4 | C07      | 330    | 213   | 64.5 | P02       | 6,505   | 315    | 4.8  | P02        | 17,754  | 1,109  | 6.2  | D07         | 24,036 | 1,379  | 5.7  |
| M01                                                                                 | 57,744  | 3,983  | 6.9  | A06      | 728    | 154   | 21.2 | S02       | 7,601   | 267    | 3.5  | R05        | 31,820  | 1,033  | 3.2  | A10         | 1,503  | 1,310  | 87.2 |

Repeated use was defined as receiving at least three (not necessarily the same kind of) prescription drugs within the same therapeutic subgroup (on different days). The order of the ATC codes is identical to Table 2, which also shows the meaning of the codes.

**Supplementary Table 3.** Ratio of the prevalence of repeated use to the prevalence of any use of the 10 most common therapeutic subgroups used repeatedly in each age group among boys

| ATC code, individuals with any use (n), individuals with chronic use (n), ratio (%) |         |        |      |          |        |       |      |           |         |        |      |            |         |        |      |             |        |        |      |
|-------------------------------------------------------------------------------------|---------|--------|------|----------|--------|-------|------|-----------|---------|--------|------|------------|---------|--------|------|-------------|--------|--------|------|
| All boys                                                                            |         |        |      | <2 years |        |       |      | 2–5 years |         |        |      | 6–12 years |         |        |      | 13–17 years |        |        |      |
| J01                                                                                 | 342,017 | 46,156 | 13.5 | R03      | 36,252 | 7,751 | 21.4 | J01       | 116,884 | 20,959 | 17.9 | R03        | 60,871  | 14,937 | 24.5 | N06         | 17,742 | 13,005 | 73.3 |
| R03                                                                                 | 195,849 | 45,319 | 23.1 | J01      | 33,249 | 5,052 | 15.2 | R03       | 68,849  | 16,105 | 23.4 | N06        | 16,286  | 13,428 | 82.5 | J01         | 76,978 | 7,170  | 9.3  |
| N06                                                                                 | 34,128  | 26,483 | 77.6 | S01      | 32,992 | 2,704 | 8.2  | S01       | 72,620  | 5,183  | 7.1  | J01        | 114,906 | 12,975 | 11.3 | R03         | 29,877 | 6,526  | 21.8 |
| S01                                                                                 | 155,056 | 9,996  | 6.4  | D07      | 9,704  | 811   | 8.4  | H02       | 31,947  | 2,144  | 6.7  | N03        | 2,654   | 2,095  | 78.9 | D10         | 23,581 | 5,447  | 23.1 |
| D10                                                                                 | 24,925  | 5,508  | 22.1 | J06      | 1,353  | 748   | 55.3 | R05       | 36,309  | 2,118  | 5.8  | R01        | 19,303  | 1,792  | 9.3  | H03         | 4,186  | 2,404  | 57.4 |
| D07                                                                                 | 88,138  | 4,957  | 5.6  | H02      | 14,510 | 720   | 5.0  | A06       | 7,086   | 2,098  | 29.6 | N05        | 3,460   | 1,687  | 48.8 | M01         | 43,504 | 2,032  | 4.7  |
| N03                                                                                 | 5,840   | 4,508  | 77.2 | A11      | 26,098 | 417   | 1.6  | D07       | 29,516  | 1,767  | 6.0  | V01        | 10,188  | 1,594  | 15.6 | N05         | 3,168  | 1,710  | 54.0 |
| H02                                                                                 | 70,725  | 4,295  | 6.1  | R05      | 9,317  | 336   | 3.6  | N03       | 892     | 677    | 75.9 | S01        | 35,232  | 1,434  | 4.1  | N03         | 2,041  | 1,613  | 79.0 |
| R05                                                                                 | 97,605  | 4,283  | 4.4  | A06      | 659    | 146   | 22.2 | S02       | 8,969   | 386    | 4.3  | D07        | 32,197  | 1,377  | 4.3  | A10         | 1,670  | 1,527  | 91.4 |
| H03                                                                                 | 6,466   | 3,866  | 59.8 | N03      | 253    | 123   | 48.6 | R01       | 4,568   | 349    | 7.6  | H01        | 3,477   | 1,360  | 39.1 | R01         | 18,075 | 1,493  | 8.3  |

Repeated use was defined as receiving at least three (not necessarily the same kind of) prescription drugs within the same therapeutic subgroup (on different days). The order of the ATC codes is identical to Table 3, which also shows the meaning of the codes.

**Supplementary Table 4.** Ratio of the prevalence of repeated use to the prevalence of any use of the 20 most common prescription drugs used repeatedly in each age group among girls

| ATC code, individuals with any use (n), individuals with chronic use (n), ratio (%) |         |        |      |          |        |       |      |           |        |       |      |            |        |       |      |             |        |        |      |
|-------------------------------------------------------------------------------------|---------|--------|------|----------|--------|-------|------|-----------|--------|-------|------|------------|--------|-------|------|-------------|--------|--------|------|
| All girls                                                                           |         |        |      | <2 years |        |       |      | 2–5 years |        |       |      | 6–12 years |        |       |      | 13–17 years |        |        |      |
| G03AA07                                                                             | 41,194  | 22,472 | 54.6 | R03AC02  | 13,107 | 1,251 | 9.5  | R03AC02   | 31,143 | 3,997 | 12.8 | N06BA04    | 3,849  | 2,866 | 74.5 | G03AA07     | 41,112 | 22,454 | 54.6 |
| G03AA16                                                                             | 25,462  | 14,950 | 58.7 | R03CC02  | 13,432 | 911   | 6.8  | A06AD65   | 8,953  | 2,620 | 29.3 | R03AC02    | 27,155 | 2,827 | 10.4 | G03AA16     | 25,406 | 14,939 | 58.8 |
| R03AC02                                                                             | 89,032  | 9,663  | 10.9 | J06BB16  | 1,073  | 579   | 54.0 | J01DC04   | 34,623 | 1,931 | 5.6  | R03AK06    | 4,585  | 1,656 | 36.1 | G03AA15     | 9,376  | 5,306  | 56.6 |
| N06BA04                                                                             | 7,581   | 5,418  | 71.5 | J01DC04  | 9,924  | 511   | 5.1  | J01CA04   | 40,597 | 1,741 | 4.3  | A06AD65    | 5,336  | 1,340 | 25.1 | H03AA01     | 6,773  | 3,772  | 55.7 |
| H03AA01                                                                             | 9,158   | 5,313  | 58.0 | S01AE01  | 13,376 | 486   | 3.6  | R05DA07   | 31,988 | 1,596 | 5.0  | H03AA01    | 1,901  | 1,231 | 64.8 | N06BA04     | 3,714  | 2,546  | 68.6 |
| G03AA15                                                                             | 9,391   | 5,308  | 56.5 | J01CA04  | 12,239 | 461   | 3.8  | R03CC02   | 18,949 | 1,403 | 7.4  | J01DC04    | 27,597 | 1,075 | 3.9  | M01AE01     | 45,468 | 2,290  | 5.0  |
| A06AD65                                                                             | 15,485  | 4,240  | 27.4 | A11CC05  | 25,391 | 385   | 1.5  | S01AE01   | 28,500 | 946   | 3.3  | J01CA04    | 30,500 | 1,039 | 3.4  | G03AA09     | 2,871  | 1,713  | 59.7 |
| J01CA04                                                                             | 105,114 | 3,784  | 3.6  | R05DA07  | 8,020  | 260   | 3.2  | R03BA05   | 3,912  | 880   | 22.5 | R03BA05    | 3,559  | 819   | 23.0 | R03AC02     | 17,627 | 1,588  | 9.0  |
| J01DC04                                                                             | 79,566  | 3,714  | 4.7  | C07AA05  | 312    | 209   | 67.0 | R03DC03   | 3,669  | 871   | 23.7 | R03DC03    | 2,716  | 667   | 24.6 | G03AC09     | 3,508  | 1,409  | 40.2 |
| R03AK06                                                                             | 9,894   | 3,209  | 32.4 | S01AA11  | 7,495  | 193   | 2.6  | R03BA02   | 3,797  | 556   | 14.6 | R05DA07    | 25,838 | 662   | 2.6  | D10AF54     | 8,036  | 1,248  | 15.5 |
| R05DA07                                                                             | 74,273  | 2,627  | 3.5  | S01AA24  | 6,259  | 166   | 2.7  | R03AK06   | 1,554  | 524   | 33.7 | P02CC01    | 11,010 | 587   | 5.3  | G03AA12     | 1,919  | 1,028  | 53.6 |
| M01AE01                                                                             | 52,400  | 2,507  | 4.8  | R03DC03  | 893    | 160   | 17.9 | J01CE02   | 16,397 | 425   | 2.6  | R01AD09    | 7,999  | 560   | 7.0  | R03AK06     | 3,612  | 998    | 27.6 |
| R03CC02                                                                             | 38,456  | 2,476  | 6.4  | A06AD65  | 728    | 154   | 21.2 | H02AB07   | 12,242 | 394   | 3.2  | A10AB05    | 674    | 529   | 78.5 | N06AB03     | 1,700  | 928    | 54.6 |
| R03BA05                                                                             | 9,372   | 2,024  | 21.6 | R03BB01  | 1,870  | 146   | 7.8  | R03BB01   | 3,508  | 377   | 10.7 | R03BA02    | 4,120  | 501   | 12.2 | A10AB05     | 943    | 807    | 85.6 |
| R03DC03                                                                             | 8,730   | 2,002  | 22.9 | R03BA02  | 1,126  | 135   | 12.0 | S01AA11   | 16,239 | 368   | 2.3  | N03AG01    | 607    | 495   | 81.5 | G03AA14     | 1,453  | 715    | 49.2 |
| G03AA09                                                                             | 2,876   | 1,715  | 59.6 | H02AB07  | 5,670  | 123   | 2.2  | D07AC14   | 7,538  | 366   | 4.9  | J01CE02    | 22,154 | 489   | 2.2  | G03HB01     | 1,379  | 713    | 51.7 |
| S01AE01                                                                             | 59,797  | 1,660  | 2.8  | D07AC14  | 2,427  | 108   | 4.4  | J01DC02   | 9,645  | 339   | 3.5  | G04BD06    | 1,151  | 475   | 41.3 | D10AD23     | 5,852  | 674    | 11.5 |
| R03BA02                                                                             | 12,683  | 1,474  | 11.6 | R03BA05  | 850    | 107   | 12.6 | J01DD13   | 7,140  | 294   | 4.1  | J01DC02    | 12,772 | 411   | 3.2  | R01AD09     | 10,584 | 658    | 6.2  |
| G03AC09                                                                             | 3,522   | 1,410  | 40.0 | J01DD13  | 2,329  | 89    | 3.8  | R03BA01   | 1,859  | 287   | 15.4 | N03AX14    | 440    | 375   | 85.2 | D10BA01     | 1,037  | 630    | 60.8 |
| A10AB05                                                                             | 1,721   | 1,400  | 81.3 | S01AA26  | 3,277  | 81    | 2.5  | S01AA24   | 12,549 | 263   | 2.1  | V01AA02    | 2,119  | 344   | 16.2 | N02BB02     | 15,828 | 602    | 3.8  |

Repeated use was defined as receiving at least three (of the same) prescription drugs on different days. The order of the ATC codes is identical to Table 4, which also shows the meaning of the codes.

**Supplementary Table 5.** Ratio of the prevalence of repeated use to the prevalence of any use of the 20 most common prescription drugs used repeatedly in each age group among boys

| ATC code, individuals with any use (n), individuals with chronic use (n), ratio (%) |         |        |      |          |        |       |      |           |        |       |      |            |        |        |      |             |        |       |      |
|-------------------------------------------------------------------------------------|---------|--------|------|----------|--------|-------|------|-----------|--------|-------|------|------------|--------|--------|------|-------------|--------|-------|------|
| All boys                                                                            |         |        |      | <2 years |        |       |      | 2–5 years |        |       |      | 6–12 years |        |        |      | 13–17 years |        |       |      |
| N06BA04                                                                             | 27,957  | 21,111 | 75.5 | R03AC02  | 20,736 | 2,766 | 13.3 | R03AC02   | 44,152 | 6,563 | 14.9 | N06BA04    | 14,270 | 11,267 | 79.0 | N06BA04     | 13,616 | 9,805 | 72.0 |
| R03AC02                                                                             | 131,150 | 16,848 | 12.8 | R03CC02  | 18,864 | 1,725 | 9.1  | J01DC04   | 38,613 | 2,202 | 5.7  | R03AC02    | 44,571 | 5,297  | 11.9 | R03AC02     | 21,691 | 2,222 | 10.2 |
| R03AK06                                                                             | 16,442  | 5,708  | 34.7 | J06BB16  | 1,344  | 747   | 55.6 | J01CA04   | 45,687 | 2,198 | 4.8  | R03AK06    | 8,612  | 3,250  | 37.7 | H03AA01     | 3,736  | 2,149 | 57.5 |
| J01CA04                                                                             | 112,705 | 4,465  | 4.0  | J01CA04  | 15,563 | 719   | 4.6  | A06AD65   | 7,086  | 2,098 | 29.6 | R03BA05    | 6,589  | 1,722  | 26.1 | N06BA12     | 2,297  | 1,789 | 77.9 |
| J01DC04                                                                             | 83,461  | 4,064  | 4.9  | J01DC04  | 12,287 | 715   | 5.8  | R03CC02   | 22,359 | 1,946 | 8.7  | N06BA12    | 2,230  | 1,714  | 76.9 | R03AK06     | 5,021  | 1,557 | 31.0 |
| R03CC02                                                                             | 48,613  | 3,915  | 8.1  | S01AE01  | 15,760 | 637   | 4.0  | R05DA07   | 33,209 | 1,760 | 5.3  | R03DC03    | 4,693  | 1,448  | 30.9 | M01AE01     | 40,635 | 1,517 | 3.7  |
| R03BA05                                                                             | 16,157  | 3,814  | 23.6 | A11CC05  | 26,046 | 397   | 1.5  | R03BA05   | 6,282  | 1,488 | 23.7 | A06AD65    | 5,122  | 1,342  | 26.2 | D10BA01     | 2,831  | 1,396 | 49.3 |
| A06AD65                                                                             | 13,325  | 3,711  | 27.8 | R03DC03  | 1,722  | 335   | 19.5 | R03DC03   | 5,239  | 1,384 | 26.4 | J01CA04    | 32,013 | 1,139  | 3.6  | D10AF54     | 7,134  | 1,092 | 15.3 |
| R03DC03                                                                             | 13,470  | 3,666  | 27.2 | R05DA07  | 8,938  | 312   | 3.5  | S01AE01   | 32,941 | 1,176 | 3.6  | R01AD09    | 13,087 | 1,116  | 8.5  | A10AB05     | 1,133  | 990   | 87.4 |
| H03AA01                                                                             | 5,897   | 3,546  | 60.1 | R03BA02  | 2,127  | 300   | 14.1 | R03BA02   | 5,833  | 929   | 15.9 | H03AA01    | 1,665  | 1,090  | 65.5 | N05AX08     | 1,235  | 895   | 72.5 |
| N06BA12                                                                             | 4,534   | 3,506  | 77.3 | R03BB01  | 3,107  | 294   | 9.5  | R03AK06   | 2,473  | 828   | 33.5 | J01DC04    | 26,464 | 995    | 3.8  | R01AD09     | 11,580 | 856   | 7.4  |
| R05DA07                                                                             | 78,737  | 2,991  | 3.8  | H02AB07  | 8,885  | 291   | 3.3  | H02AB07   | 18,309 | 777   | 4.2  | G04BD06    | 2,054  | 976    | 47.5 | N06BA09     | 911    | 691   | 75.9 |
| R03BA02                                                                             | 19,631  | 2,553  | 13.0 | R03BA05  | 1,722  | 271   | 15.7 | R03BB01   | 5,104  | 624   | 12.2 | R03BA02    | 7,371  | 942    | 12.8 | D10AD23     | 5,330  | 670   | 12.6 |
| R01AD09                                                                             | 27,910  | 2,215  | 7.9  | S01AA11  | 8,946  | 255   | 2.9  | D07AC14   | 8,313  | 562   | 6.8  | N05AX08    | 1,206  | 838    | 69.5 | N03AG01     | 685    | 574   | 83.8 |
| S01AE01                                                                             | 66,087  | 2,024  | 3.1  | D07AC14  | 3,416  | 214   | 6.3  | J01CE02   | 19,542 | 480   | 2.5  | H01BA02    | 2,676  | 830    | 31.0 | V01AA02     | 4,472  | 571   | 12.8 |
| N05AX08                                                                             | 2,478   | 1,748  | 70.5 | S01AA24  | 7,059  | 188   | 2.7  | S01AA11   | 19,733 | 420   | 2.1  | R05DA07    | 28,459 | 799    | 2.8  | R03DC03     | 1,816  | 499   | 27.5 |
| M01AE01                                                                             | 47,288  | 1,665  | 3.5  | D07AB11  | 2,365  | 151   | 6.4  | R03BA01   | 2,845  | 409   | 14.4 | V01AA02    | 4,681  | 775    | 16.6 | J01CA04     | 19,442 | 409   | 2.1  |
| A10AB05                                                                             | 2,017   | 1,662  | 82.4 | A06AD65  | 659    | 145   | 22.0 | J01DC02   | 10,888 | 360   | 3.3  | N06BA09    | 1,019  | 754    | 74.0 | H01AC01     | 576    | 390   | 67.7 |
| N03AG01                                                                             | 1,802   | 1,506  | 83.6 | H02AB06  | 4,857  | 137   | 2.8  | H02AB06   | 9,707  | 341   | 3.5  | N03AG01    | 780    | 651    | 83.5 | R03BA02     | 4,300  | 382   | 8.9  |
| N06BA09                                                                             | 1,935   | 1,448  | 74.8 | J01DD13  | 2,728  | 115   | 4.2  | S01AA24   | 14,255 | 329   | 2.3  | A10AB05    | 760    | 592    | 77.9 | B01AB05     | 3,001  | 377   | 12.6 |

Repeated use was defined as receiving at least three (of the same) prescription drugs on different days. The order of the ATC codes is identical to Table 5, which also shows the meaning of the codes.

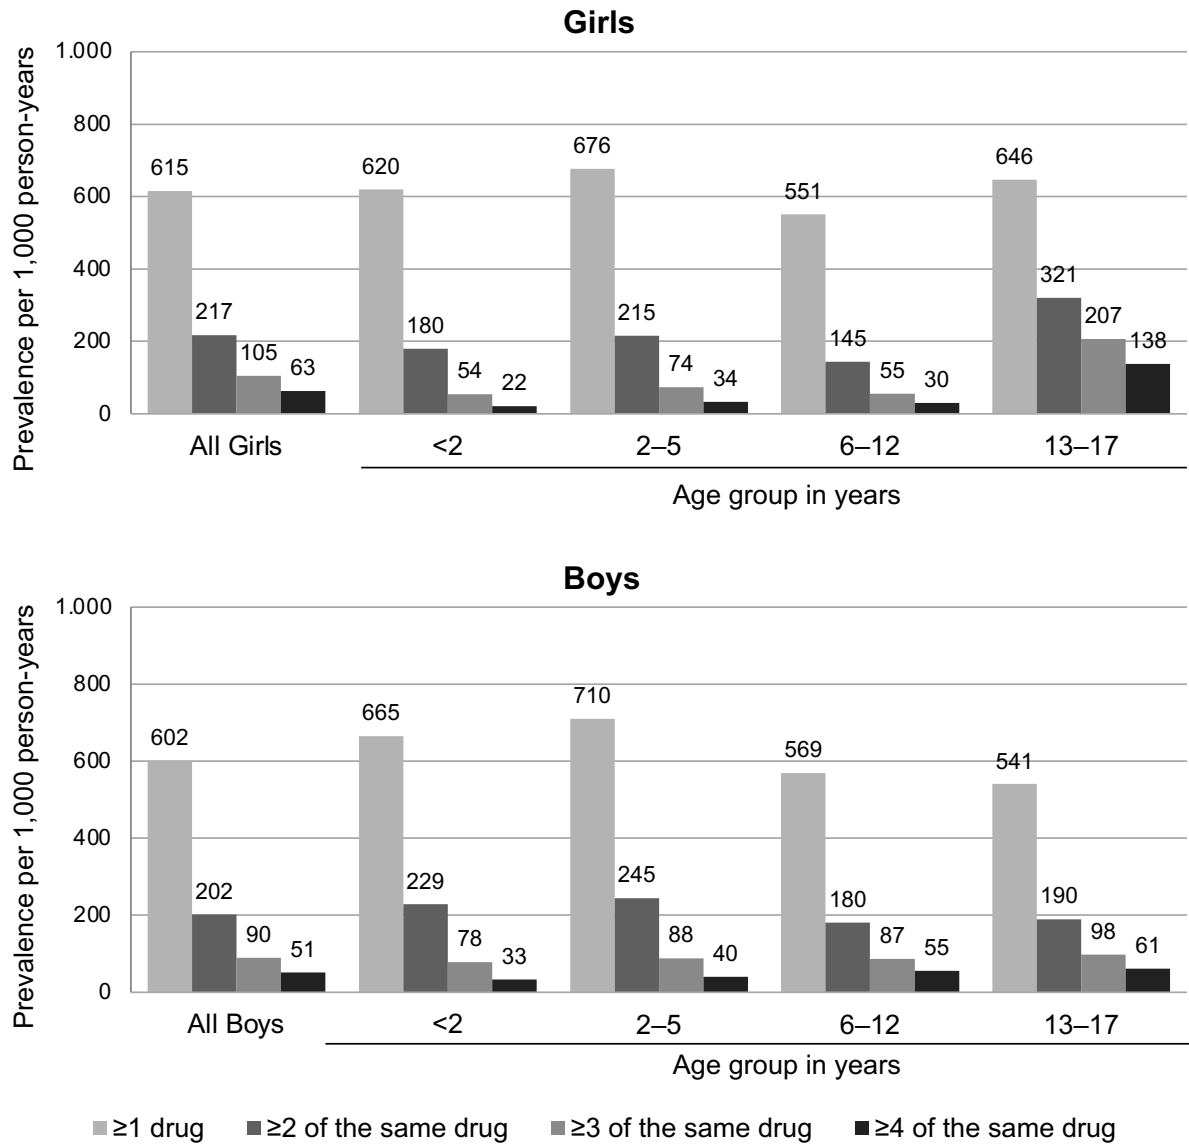

**Supplementary Figure 1.** Prevalence of any ( $\geq 1$  per year) and repeated use of prescription drugs based on different counts (per year) by sex and age

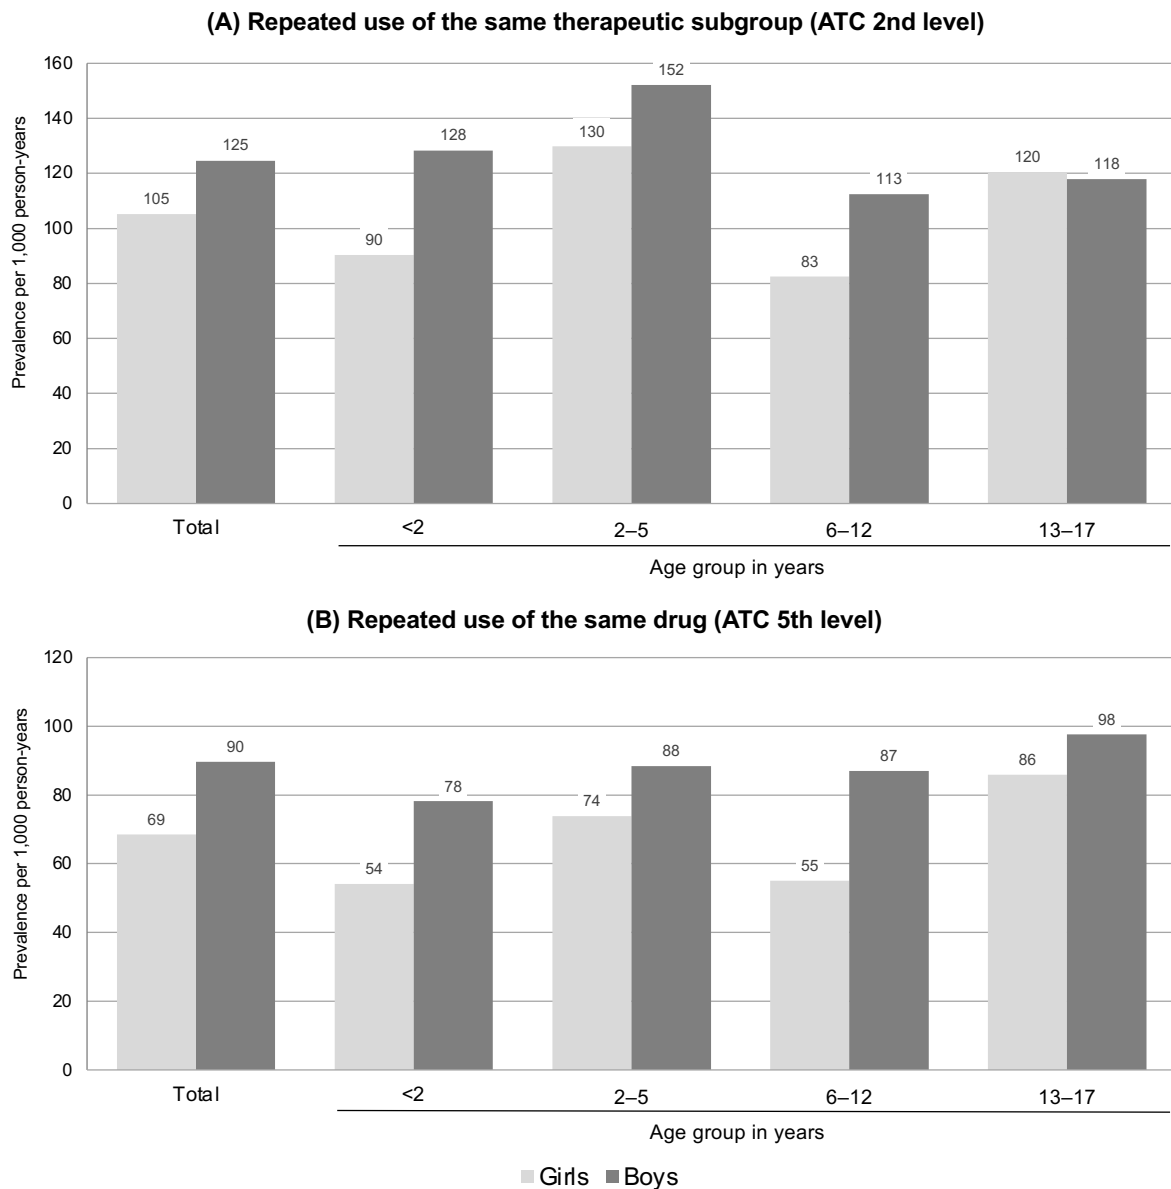

**Supplementary Figure 2.** Prevalence of repeated ( $\geq 3$  per year) use of prescription drugs on the level of therapeutic subgroups **(A)** and on the level of the individual drug **(B)** by sex and age after excluding “sex hormones and modulators of the genital system” (ATC G03) (prevalence per 1,000 person-years)
